# Supplementary material
Source: publisher figshare collection journal article supplement (https://acs.figshare.com/ndownloader/files/5964954)
Supplement: Supplementary file 1 [file 5964954]

## Sheet: Target_database_chembl
TID	TARGET_NAME	ORGANISM
11489	11-beta-hydroxysteroid dehydrogenase 1	Homo sapiens
103740	3C-like protease	Infectious bronchitis virus
103968	60S ribosomal protein L19-A	Saccharomyces cerevisiae S288c
17018	Acetylcholinesterase	Electrophorus electricus
93	Acetylcholinesterase	Homo sapiens
114	Adenosine A1 receptor	Homo sapiens
12265	Adenosine A1 receptor	Bos taurus
12512	Adenosine A1 receptor	Rattus norvegicus
11736	Adenosine A2a receptor	Rattus norvegicus
252	Adenosine A2a receptor	Homo sapiens
278	Adenosine A2b receptor	Homo sapiens
12171	Adenosine A3 receptor	Rattus norvegicus
280	Adenosine A3 receptor	Homo sapiens
11131	Aldehyde dehydrogenase dimeric NADP-preferring	Homo sapiens
100481	Aldo-keto-reductase family 1 member C3	Homo sapiens
12543	Aldose reductase	Rattus norvegicus
242	Aldose reductase	Homo sapiens
11919	Alkaline phosphatase placental-like	Homo sapiens
101624	Alkaline phosphatase, tissue-nonspecific isozyme	Homo sapiens
102979	Alpha carbonic anhydrase	Stylophora pistillata
12514	Alpha-1a adrenergic receptor	Rattus norvegicus
125	Alpha-1a adrenergic receptor	Homo sapiens
12474	Alpha-1b adrenergic receptor	Rattus norvegicus
128	Alpha-1b adrenergic receptor	Homo sapiens
103	Alpha-1d adrenergic receptor	Homo sapiens
12742	Alpha-1d adrenergic receptor	Rattus norvegicus
52	Alpha-2a adrenergic receptor	Homo sapiens
216	Alpha-2b adrenergic receptor	Homo sapiens
218	Alpha-2c adrenergic receptor	Homo sapiens
10693	Alpha-galactosidase A	Homo sapiens
12832	Androgen Receptor	Rattus norvegicus
56	Androgen Receptor	Homo sapiens
100639	Anthrax lethal factor	Bacillus anthracis
11134	Arachidonate 12-lipoxygenase	Homo sapiens
12054	Arachidonate 15-lipoxygenase	Homo sapiens
20075	Arachidonate 15-lipoxygenase	Oryctolagus cuniculus
12166	Arachidonate 5-lipoxygenase	Rattus norvegicus
55	Arachidonate 5-lipoxygenase	Homo sapiens
10694	Aryl hydrocarbon receptor	Homo sapiens
104449	Astrosclerin-3	Astrosclera willeyana
100974	ATP-binding cassette sub-family G member 2	Homo sapiens
103669	ATP-dependent DNA helicase Q1	Homo sapiens
103684	ATP-dependent molecular chaperone HSP82	Candida albicans (strain WO-1) (Yeast)
103672	Bcl-2-related protein A1	Mus musculus
10656	Beta amyloid A4 protein	Homo sapiens
103679	Beta Lactamase	Pseudomonas aeruginosa
43	Beta-2 adrenergic receptor	Homo sapiens
10733	Beta-glucocerebrosidase	Homo sapiens
11180	Bile acid receptor FXR	Homo sapiens
103670	Bloom syndrome protein	Homo sapiens
10532	Butyrylcholinesterase	Homo sapiens
103981	CAAX prenyl protease 1	Saccharomyces cerevisiae S288c
103527	CAAX prenyl protease 2	Saccharomyces cerevisiae S288c
17085	Calpain 2	Sus scrofa
87	Cannabinoid CB1 receptor	Homo sapiens
259	Cannabinoid CB2 receptor	Homo sapiens
100954	Carbonic anhydrase	Candida albicans (strain SC5314 / ATCC MYA-2876) (Yeast)
101385	Carbonic anhydrase	Saccharomyces cerevisiae S288c
103851	Carbonic anhydrase	Stylophora pistillata
100679	Carbonic anhydrase 1	Helicobacter pylori (strain ATCC 700392 / 26695) (Campylobacterpylori)
101402	Carbonic anhydrase 15	Mus musculus
10193	Carbonic anhydrase I	Homo sapiens
15	Carbonic anhydrase II	Homo sapiens
11035	Carbonic anhydrase IV	Bos taurus
12896	Carbonic anhydrase IV	Homo sapiens
12952	Carbonic anhydrase IX	Homo sapiens
11042	Carbonic anhydrase VA	Homo sapiens
11016	Carbonic anhydrase VB	Homo sapiens
10186	Carbonic anhydrase VI	Homo sapiens
11060	Carbonic anhydrase VII	Homo sapiens
12209	Carbonic anhydrase XII	Homo sapiens
10989	Carbonic anhydrase XIII	Mus musculus
12923	Carbonic anhydrase XIII	Homo sapiens
11063	Carbonic anhydrase XIV	Homo sapiens
11624	Caspase-1	Homo sapiens
12067	Caspase-7	Homo sapiens
10378	Cathepsin B	Homo sapiens
101542	Cholinesterase	Equus caballus
11408	c-Jun N-terminal kinase 3	Homo sapiens
101310	CREB-binding protein	Homo sapiens
17047	Cyclooxygenase-1	Ovis aries
96	Cyclooxygenase-1	Homo sapiens
126	Cyclooxygenase-2	Homo sapiens
17100	Cyclooxygenase-2	Ovis aries
104017	Cysteine protease ATG4B	Homo sapiens
11541	Cytochrome P450 11B2	Homo sapiens
65	Cytochrome P450 19A1	Homo sapiens
11113	Cytochrome P450 1A1	Homo sapiens
12594	Cytochrome P450 1A2	Homo sapiens
10147	Cytochrome P450 1B1	Homo sapiens
12912	Cytochrome P450 2C19	Homo sapiens
12911	Cytochrome P450 2C9	Homo sapiens
11365	Cytochrome P450 2D6	Homo sapiens
103737	Cytoplasmic zinc-finger protein	Caenorhabditis elegans
107983	Delta carbonic anhydrase	Thalassiosira weissflogii
136	Delta opioid receptor	Homo sapiens
10358	Dihydrofolate reductase	Rattus norvegicus
105132	DNA damage-inducible transcript 3 protein	Mus musculus
104013	DNA dC->dU-editing enzyme APOBEC-3G	Homo sapiens
105690	DNA repair protein RAD52 homolog	Homo sapiens
104164	DNA topoisomerase	Yersinia pestis
130	Dopamine D3 receptor	Homo sapiens
90	Dopamine D4 receptor	Homo sapiens
13077	Dopamine transporter	Rattus norvegicus
155	Dopamine transporter	Homo sapiens
30036	Dual specificity protein kinase CLK4	Homo sapiens
11160	Dual specificity protein phosphatase 3	Homo sapiens
101002	Dual specificity tyrosine-phosphorylation-regulated kinase 1A	Rattus norvegicus
30013	Dual specificty protein kinase CLK1	Homo sapiens
12090	Dual-specificity tyrosine-phosphorylation regulated kinase 1A	Homo sapiens
103718	Endonuclease 4	Escherichia coli K-12
103692	Ephrin type-A receptor 4	Mus musculus
9	Epidermal growth factor receptor erbB1	Homo sapiens
11727	Epoxide hydratase	Homo sapiens
103714	Epstein-Barr nuclear antigen 1	Epstein-Barr virus (strain B95-8) (HHV-4) (Human herpesvirus 4)
19	Estrogen receptor alpha	Homo sapiens
174	Estrogen receptor beta	Homo sapiens
103985	FAD-linked sulfhydryl oxidase ALR	Homo sapiens
103735	Female germline-specific tumor suppressor gld-1	Caenorhabditis elegans
11400	FK506 binding protein 12	Homo sapiens
103622	Fructose-bisphosphate aldolase	Mycobacterium tuberculosis
20174	G protein-coupled receptor 44	Homo sapiens
12886	Galanin receptor 3	Homo sapiens
103711	Geminin	Homo sapiens
103974	General amino acid permease AGP1	Saccharomyces cerevisiae S288c
25	Glucocorticoid receptor	Homo sapiens
104008	Glucose-6-phosphate dehydrogenase-6-phosphogluconolactonase	Plasmodium berghei
103724	Glutathione-independent formaldehyde dehydrogenase	Pseudomonas putida
11757	Glyceraldehyde-3-phosphate dehydrogenase liver	Homo sapiens
11017	Glycogen synthase kinase-3 alpha	Homo sapiens
10197	Glycogen synthase kinase-3 beta	Homo sapiens
100857	G-protein coupled bile acid receptor 1	Homo sapiens
103700	G-protein coupled receptor 35	Homo sapiens
103170	G-protein coupled receptor 55	Homo sapiens
10711	G-protein coupled receptor kinase 2	Homo sapiens
100911	Heat shock factor protein 1	Mus musculus
11213	Heat shock protein HSP 90-alpha	Homo sapiens
12388	Hematopoietic cell protein-tyrosine phosphatase 70Z-PEP	Homo sapiens
11544	Hemoglobin beta chain	Homo sapiens
165	HERG	Homo sapiens
127	Histamine H1 receptor	Homo sapiens
104168	HSP90	Plasmodium falciparum 3D7
191	Human immunodeficiency virus type 1 protease	Human immunodeficiency virus 1
228	Human immunodeficiency virus type 1 reverse transcriptase	Human immunodeficiency virus 1
100325	Hypoxia-inducible factor 1 alpha	Homo sapiens
100468	Induced myeloid leukemia cell differentiation protein Mcl-1	Homo sapiens
103720	Insulin-degrading enzyme	Homo sapiens
101024	Intestinal alkaline phosphatase	Homo sapiens
12754	Intestinal alkaline phosphatase	Mus musculus
137	Kappa opioid receptor	Homo sapiens
103682	Kruppel-like factor 5	Homo sapiens
104171	Latent membrane protein 1	Human herpesvirus 4 (strain B95-8)
103680	Luciferase	Photuris pennsylvanica
101018	Luciferin 4-monooxygenase	Photinus pyralis
101085	Luciferin 4-monooxygenase	Photuris pennsylvanica
102452	Lysine-specific demethylase 4C	Homo sapiens
103746	M17 leucyl aminopeptidase	Plasmodium falciparum 3D7
103696	M18 aspartyl aminopeptidase	Plasmodium falciparum 3D7
103745	M1-family aminopeptidase	Plasmodium falciparum 3D7
11872	Mannose-6-phosphate isomerase	Homo sapiens
10188	MAP kinase p38 alpha	Homo sapiens
11024	Matrix metalloproteinase 13	Homo sapiens
13001	Matrix metalloproteinase-2	Homo sapiens
103676	MCOLN3 protein	Homo sapiens
12476	Metabotropic glutamate receptor 5	Rattus norvegicus
103961	Microphthalmia-associated transcription factor	Homo sapiens
103990	Mitochondrial import inner membrane translocase subunit TIM10	Saccharomyces cerevisiae S288c
103976	Mitochondrial import inner membrane translocase subunit TIM23	Saccharomyces cerevisiae S288c
86	Monoamine oxidase A	Homo sapiens
104	Monoamine oxidase B	Homo sapiens
104178	mRNA interferase MazF	Escherichia coli K-12
12076	Muscarinic acetylcholine receptor M2	Rattus norvegicus
47	Muscarinic acetylcholine receptor M2	Homo sapiens
219	Muscarinic acetylcholine receptor M3	Homo sapiens
214	Muscarinic acetylcholine receptor M4	Homo sapiens
215	Muscarinic acetylcholine receptor M5	Homo sapiens
104004	NACHT, LRR and PYD domains-containing protein 3	Homo sapiens
103630	NADPH oxidase 1	Homo sapiens
10184	Neurokinin 2 receptor	Homo sapiens
10475	Neuropeptide Y receptor type 1	Homo sapiens
10477	Neuropeptide Y receptor type 2	Homo sapiens
100	Norepinephrine transporter	Homo sapiens
103702	NS3	Hepatitis C virus
103655	Nucleotide-binding oligomerization domain-containing protein 1	Homo sapiens
103699	Nucleotide-binding oligomerization domain-containing protein 2	Homo sapiens
105692	Paired box protein Pax-8	Homo sapiens
10436	Papain	Carica papaya
103731	Peripheral myelin protein 22	Homo sapiens
133	Peroxisome proliferator-activated receptor gamma	Homo sapiens
11398	P-glycoprotein 1	Homo sapiens
276	Phosphodiesterase 4A	Homo sapiens
3	Phosphodiesterase 5A	Homo sapiens
12651	Phospholipase A2 group 1B	Homo sapiens
100788	Photoreceptor-specific nuclear receptor	Homo sapiens
103673	Plectin	Homo sapiens
11663	Poly [ADP-ribose] polymerase-1	Homo sapiens
103719	Polyadenylate-binding protein 1	Homo sapiens
103663	Polypyrimidine tract-binding protein 1	Homo sapiens
11293	Prenyl protein specific protease	Homo sapiens
103975	Probable DNA dC->dU-editing enzyme APOBEC-3A	Homo sapiens
104322	Progesterone receptor	Bos taurus
36	Progesterone receptor	Homo sapiens
100982	Protein disulfide-isomerase	Homo sapiens
103967	Protein RecA	Mycobacterium tuberculosis
105126	Protein skinhead-1	Caenorhabditis elegans
100995	Protein tyrosine kinase 2 beta	Homo sapiens
11523	Protein-tyrosine phosphatase 2C	Homo sapiens
10756	Protein-tyrosine phosphatase G1	Homo sapiens
11521	Protein-tyrosine phosphatase LC-PTP	Homo sapiens
103957	PvdQ	Pseudomonas aeruginosa (strain LESB58)
101084	Pyruvate kinase	Leishmania mexicana
103054	Pyruvate kinase isozymes R/L	Homo sapiens
103709	Regulator of G-protein signaling 12	Homo sapiens
103749	Relaxin receptor 1	Homo sapiens
103988	Replicative DNA helicase	Mycobacterium tuberculosis
103999	Scavenger receptor class B member 1	Mus musculus
104011	Sentrin-specific protease 6	Homo sapiens
104003	Sentrin-specific protease 8	Homo sapiens
10083	Serine/threonine protein phosphatase PP1-alpha catalytic subunit	Homo sapiens
10839	Serine/threonine-protein kinase PIM1	Homo sapiens
103704	Serine/threonine-protein phosphatase	Candida dubliniensis (strain CD36 / CBS 7987 / NCPF 3949 / NRRLY-17841) (Yeast)
20137	Serine-protein kinase ATM	Homo sapiens
10576	Serotonin 1a (5-HT1a) receptor	Rattus norvegicus
51	Serotonin 1a (5-HT1a) receptor	Homo sapiens
107	Serotonin 2a (5-HT2a) receptor	Homo sapiens
12687	Serotonin 2a (5-HT2a) receptor	Rattus norvegicus
227	Serotonin 2b (5-HT2b) receptor	Homo sapiens
108	Serotonin 2c (5-HT2c) receptor	Homo sapiens
20033	Serotonin 4 (5-HT4) receptor	Cavia porcellus
10627	Serotonin 6 (5-HT6) receptor	Homo sapiens
10209	Serotonin 7 (5-HT7) receptor	Homo sapiens
12198	Serotonin transporter	Rattus norvegicus
121	Serotonin transporter	Homo sapiens
11272	Sigma opioid receptor	Homo sapiens
100459	Sigma-1 receptor	Cavia porcellus
102409	Signal transducer and activator of transcription 1-alpha/beta	Homo sapiens
11472	Signal transducer and activator of transcription 3	Homo sapiens
101176	Signal transducer and activator of transcription 6	Homo sapiens
103947	Solute carrier organic anion transporter family member 1B1	Homo sapiens
104062	Solute carrier organic anion transporter family member 1B3	Homo sapiens
11562	Sphingosine 1-phosphate receptor Edg-5	Homo sapiens
10809	Sphingosine 1-phosphate receptor Edg-6	Homo sapiens
103661	Streptokinase A	Streptococcus pyogenes serotype M1
12643	Testis-specific androgen-binding protein	Homo sapiens
11	Thrombin	Homo sapiens
103689	Thrombopoietin	Homo sapiens
248	Thromboxane-A synthase	Homo sapiens
271	Thyroid hormone receptor beta-1	Homo sapiens
185	TNF-alpha	Homo sapiens
101567	Toll-like receptor 9	Homo sapiens
101361	Trace amine-associated receptor 1	Homo sapiens
10444	Trypsin	Sus scrofa
115	Type-1 angiotensin II receptor	Homo sapiens
8	Tyrosine-protein kinase ABL	Homo sapiens
11755	Tyrosine-protein kinase FYN	Homo sapiens
10938	Tyrosine-protein kinase JAK2	Homo sapiens
10140	Tyrosine-protein kinase LCK	Homo sapiens
12670	Tyrosine-protein kinase receptor FLT3	Homo sapiens
103660	Ubiquitin carboxyl-terminal hydrolase 2	Homo sapiens
101440	Ubiquitin-conjugating enzyme E2 N	Homo sapiens
101488	Uncharacterized protein Rv1284/MT1322	Mycobacterium tuberculosis
10980	Vascular endothelial growth factor receptor 2	Homo sapiens
103972	X-box-binding protein 1	Homo sapiens
103752	Zinc finger protein mex-5	Caenorhabditis elegans
